# Supplementary material for: Cells of matter and life – towards understanding the internal structure and spatial patchiness of particles and plankton distribution in the Arctic fjords
Source: Copernicus journal article supplement (doi:10.5194/bg-2021-98), 2021-04-15
Supplement: Supplementary file 1 [file bg-2021-98-supplement.zip]

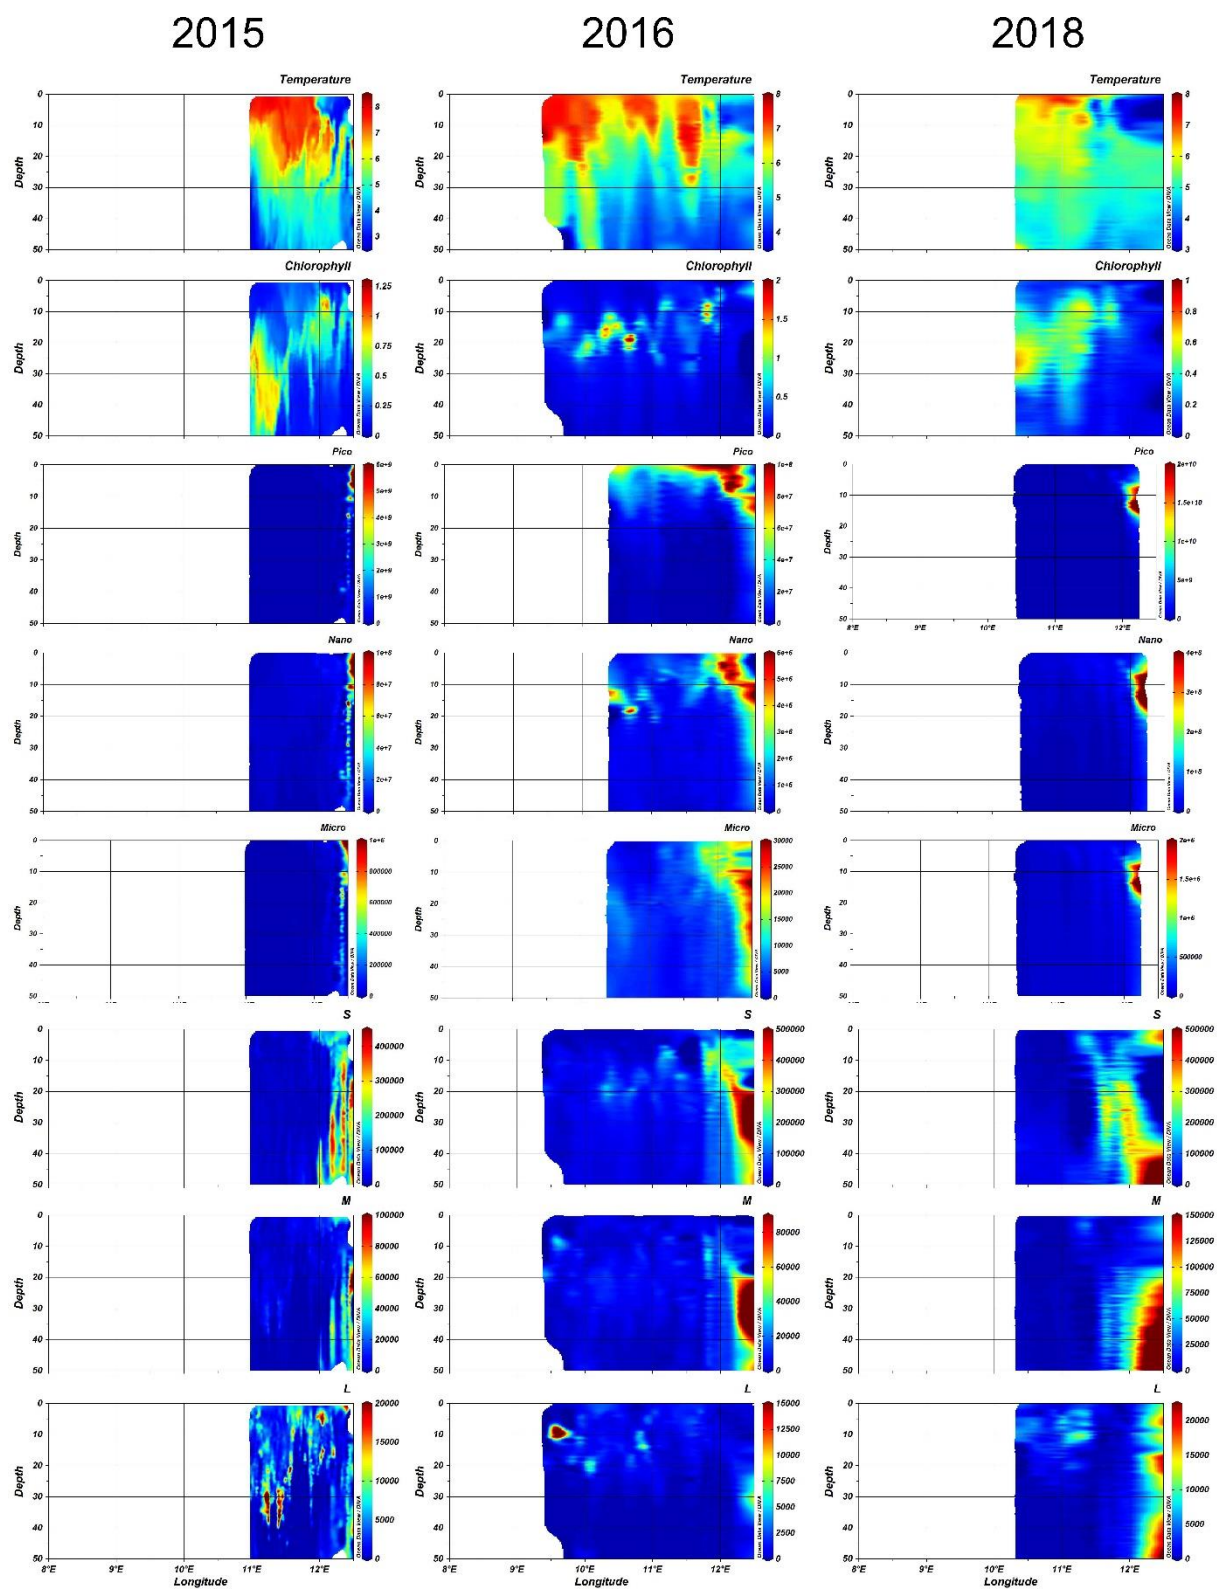

Supplementary Fig. 1. The section plots of temperature, chlorophyll fluorescence, Pico-, Nano-, Micro-, Small-, Medium- and Large- size fractions of particles and Plankton in 2015, 2016 and 2018.

## Kongsfjorden

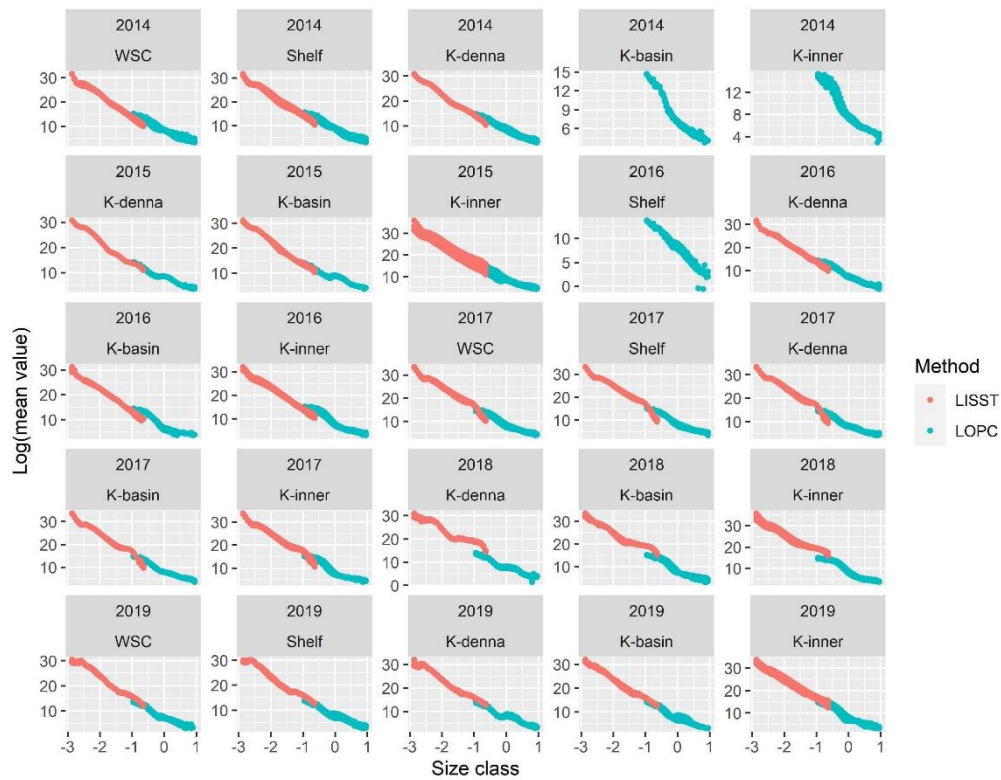

## Isfjorden

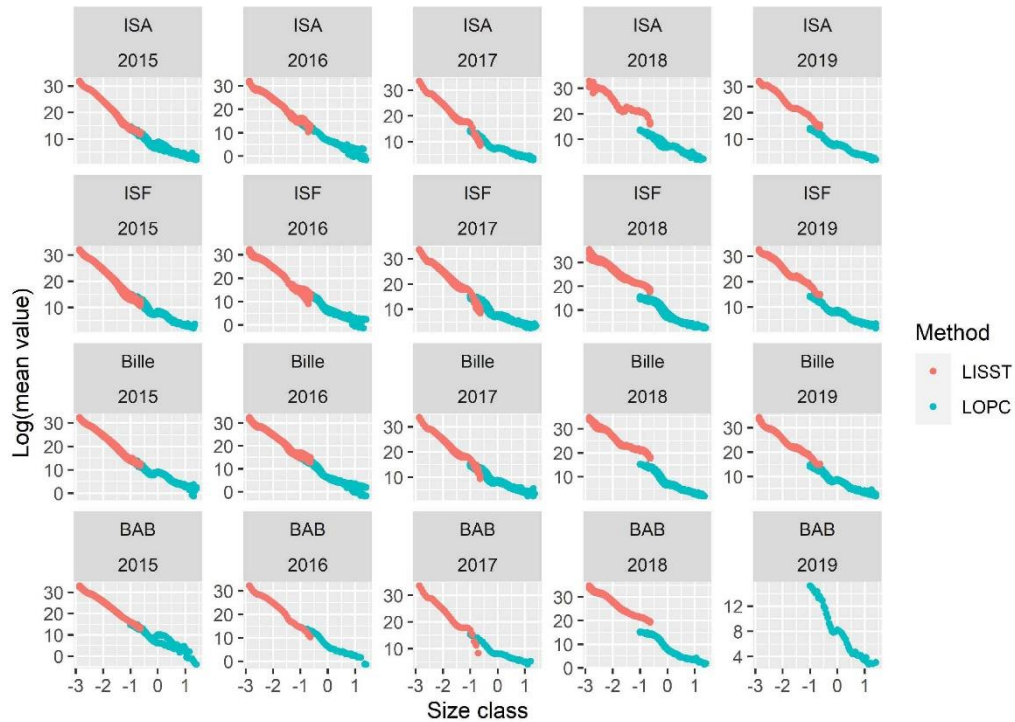

Supplementary Fig. 2. Size spectra of particles and plankton in Kongsfjorden and Isfjorden over specific sub-regions and years

a) Kongsfjorden

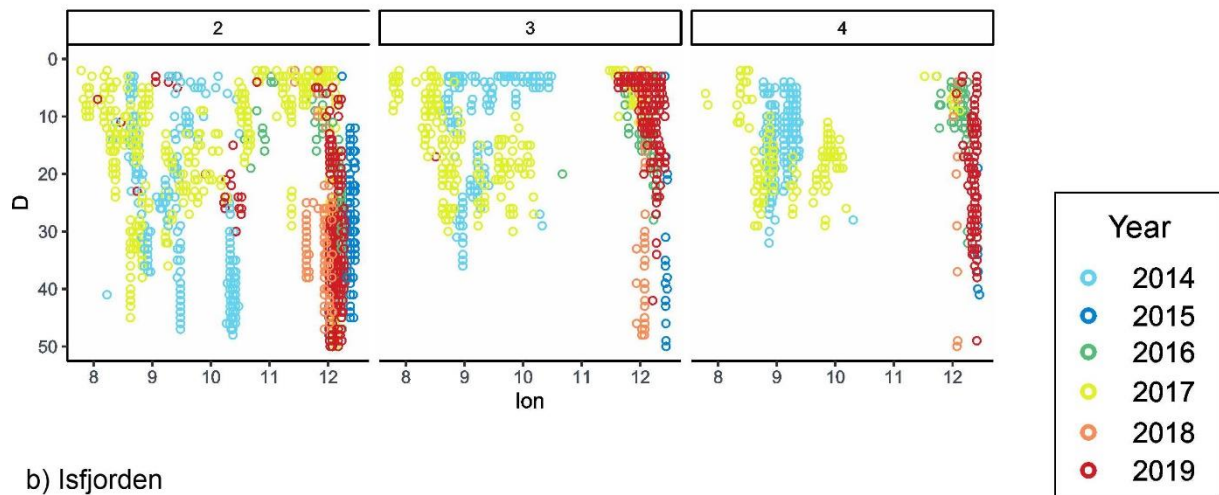

b) Isfjorden

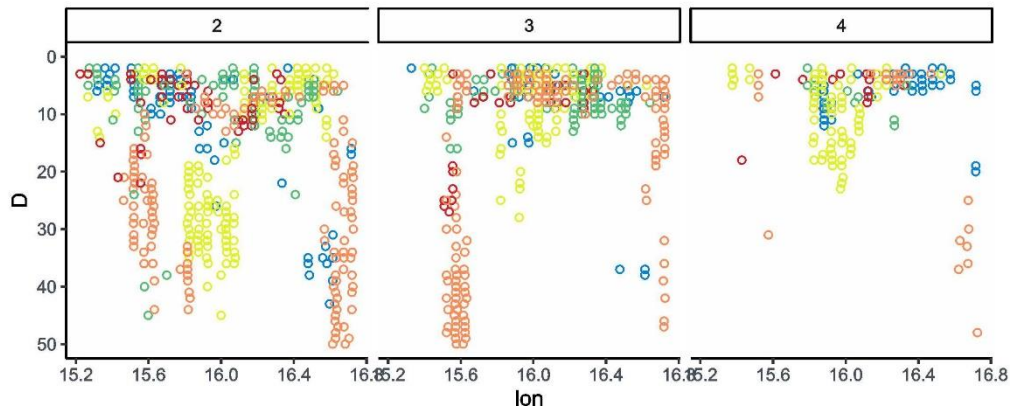

Supplementary Figure. 3. Data points representing the location of multi-fraction patches -> when 'patch' consisted of more than 2, 3 and 4 size fractions (size-specific 'patch' type of data point occurred in the same data point of the sampling grid as other size-specific 'patch' types).
