# Supplementary material for: Cells of matter and life – towards understanding the internal structure and spatial patchiness of particles and plankton distribution in the Arctic fjords
Source: Copernicus journal article supplement (doi:10.5194/bg-2021-98), 2021-04-15
Supplement: Supplementary file 2 [file bg-2021-98-supplement.zip]

Archive with 3 entries (2 files):
- PicMac_Suppl/
- PicMac_Suppl/PicMac_PatchTable.xlsx
- PicMac_Suppl/PicMac_Suppl_Figs.pdf
