# Supplementary material for: Cells of matter and life – towards understanding the internal structure and spatial patchiness of particles and plankton distribution in the Arctic fjords
Source: Copernicus journal article supplement (doi:10.5194/bg-2021-98), 2021-04-15
Supplement: Supplementary file 2 [file bg-2021-98-supplement.zip › PicMac_Suppl/PicMac_PatchTable.xlsx]

## Sheet: PatchTable
Size Fraction	N	Year	Depth [m]	Range	Lenght [km]	size	Kernel	Type	Where	Size spectrum	Intercept	Mean Size [um]	LISST Mean Size	LOPCMean Size	LISST spectrum	LOPC spectrum	Temperature	Salinity	Chlorophyll	N	Frakcja	Region	Fraction_Region	U/L	Size	Location	Part	Depth_mean	Background	greater than	Small_mean	Medium_mean	Large_mean	Pico_mean	Nano_mean	Micro_mean	Temp_sd	Depth_sd	Chlor_sd	Sal_sd	Small_sd	Medium_sd	Large_sd	Pico_sd	Nano_sd	Micro_sd	Variance/mean	Lloyd's crowding index	Lloyd's patchiness index
Pico	1	2014	3 - 18	15	48.2	0.723	Upper border	Triangle	offshore	-7.6	7.6	1.7	1.7	214	-9.08	-7.05	7	34.49	0.35	290	Pico	K	Pico_K	U	maxi	offshore	1	7.39511	11813533	1.60745	63019.7	13899.7	3522.57	18989680	1655126	4833.8	0.338667	3.66975	0.187297	0.709795	67864.8	15368.4	5950.79	8433755	509365	4689.98	3.74563e+06	2.27353e+07	71128230000001
	2	2015	14 - 39	25	2.4	0.06	Centroid	Belt	innermost	-8.26	9.9	1.6	1.6	307	-8.16	-6.04	3.8	33.11	0.14	13	Pico	K	Pico_K	L	mini	glacial	3	26.0995	769435096	1.49986	147355	35676	6258.91	1154044407	46627058	339982	0.382254	8.72531	0.0369484	1.67309	57499.1	12709.3	1646.03	373780452	12657840	137973	1.21063e+08	1.27511e+09	1.39712e+17
	3	2016 a	2 - 14	12	17.5	0.21	Upper corner	Flare	fjord	-7.85	6.7	1.5	1.5	210	-9.94	-6.7	6.7	33.87	0.1	78	Pico	K	Pico_K	U	midi	fjord	2	6.92114	24642126	1.27227	13724.3	3946.65	1097.43	31351333	840259	2250.47	0.398564	2.89153	0.0695973	0.372276	10120.4	2630.55	1195.18	6404170	332174	1302.71	1.30819e+06	3.26595e+07	41013390000001
	4	2016 b	7 - 14	7	11.4	0.0798	Centroid	Diamond	innermost	-8.26	7.7	1.7	1.7	185	-9.3	-9.37	4.6	32.59	0.22	68	Pico	K	Pico_K	L	mini	glacial	3	7.03731	24642126	2.57935	180838	11128.6	507.978	63560645	4143402	16537.5	0.7386	3.09524	0.177207	1.03187	41802.7	4753.25	554.224	28190306	1299630	3788.93	1.25029e+07	7.60636e+07	794693400000001
	5	2017 a	2 - 10	8	12.8	0.1024	Upper corner	Fingers	offshore	-8.29	8.3	1.6	1.6	193	-8.74	-8.12	7.4	34.86	0.001	48	Pico	K	Pico_K	U	mini	offshore	1	5.14618	139415803	1.12399	124712	16424.8	1772.89	156701301	7825848	62186.5	0.282922	2.38669	0.00451942	0.262327	21468.1	4650.99	1212.19	16879228	2397195	12478.2	1.81816e+06	1.58519e+08	284908300000001
	6	2017 b	2 - 15	13	26.6	0.3458	Upper border	Triangle	innermost	-8.71	7.7	1.6	1.6	177	-9.1	-8.46	5.3	33.22	0.31	175	Pico	K	Pico_K	U	midi	glacial	3	6.19431	139415803	1.50804	109661	5111.09	1275.03	210244828	11588212	46389.7	1.09661	2.95544	0.118248	0.952137	76140	2934.42	1564.11	73908526	3598368	20173.9	2.59815e+07	2.36226e+08	5462470000000001
	7	2018	2 - 23	21	2.6	0.0546	Centroid	Belt	innermost	-9	9.1	1.6	1.6	245	-8.37	-6.77	3.9	32.32	0.13	27	Pico	K	Pico_K	U	mini	glacial	3	10.1782	837638922	4.10315	130096	15406.2	2329.23	3436956914	133816749	490643	0.893908	5.63459	0.0304056	1.18504	48690.7	12504.4	1496.3	3083243981	85935371	319269	2.76593e+09	6.20289e+09	9.50639e+18
	8	2019	3 - 50	43	17.2	0.7396	None	Flag	innermost	-8.8	8	1.9	1.9	196	-8.51	-8.3	3	33.42	0.26	233	Pico	K	Pico_K	U	mini	glacial	3	18.193	58655609	2.541	149391	10558.5	1275.8	149044125	16576102	108240	0.6471	12.8755	0.218391	1.28629	101343	14424.2	1422.53	84869983	5683363	45375.9	4.83274e+07	1.97372e+08	7202914000000001
Nano	9	2014	3 - 34	31	38.5	1.1935	Corner border	Rosette	offshore	-7.69	8	2.6	2.6	200	-8.52	-8.49	6.9	35.05	0.97	320	Nano	K	Nano_K	U	maxi	offshore	1	15.7596	2262703	1.16337	140972	15821.2	1582.52	5350612	2632367	8803.48	0.262583	5.95934	0.382717	0.0521789	80877.4	9339.92	1747.55	5691181	456488	5035.36	79161.1	2.71153e+06	259453000001
	10	2015	12 - 46	34	3.1	0.1054	Centroid	Belt	innermost	-8.1	9.9	1.7	1.7	298	-7.99	-6.03	3.9	33.33	0.15	32	Nano	K	Nano_K	L	mini	glacial	3	30.4274	22537437	1.54339	147998	33754.2	6716.36	691344126	34784094	266912	0.500866	9.97886	0.0883763	1.66794	51828.5	13384.3	2524.67	478981437	14941994	123733	6.41854e+06	4.12026e+07	160220900000001
	11	2016	3 - 18	15	11.4	0.171	Upper corner	Fingers	innermost	-8.15	7.78	1.7	1.7	190	-9.18	-9.25	5	32.86	0.27	89	Nano	K	Nano_K	U	mini	glacial	3	8.15917	1739068	2.11142	193467	13275.4	598.955	51724596	3671911	15848.8	0.780622	3.64692	0.282598	1.0941	61628.7	7414.44	529.449	32435635	1439938	3939.04	564671	4.23658e+06	110339758755
	12	2017	2 - 32	30	92.3	2.769	Upper corner	Flare	whole transect	-8.53	7.9	1.8	1.8	198	-9.07	-7.76	6.5	34.6	0.69	729	Nano	K	Nano_K	U	maxi	fjord	2	14.6939	9553142	1.13381	101978	9729.6	1840.74	115805853	10831407	57647.4	0.933411	6.91783	0.604849	0.811506	71419.2	8948.82	1793.66	63916289	1960253	40090.7	354764	1.11862e+07	1689037000001
	13	2018	2 - 19	17	12.1	0.2057	Centroid	Diamond	innermost	-9	8.8	1.6	1.6	216	-8.13	-7.27	4	32.26	0.16	51	Nano	K	Nano_K	U	mini	glacial	3	8.84649	33008816	2.66998	125581	10630.6	1542.95	2018316716	88132923	331494	0.818029	4.61117	0.0551066	1.03984	47346.3	8562.43	1389.66	2694438384	79038112	286953	7.08818e+07	1.59015e+08	5746543000001
	14	2019 a	3 - 26	23	30.1	0.6923	Upper corner	Flare	offshore	-8.86	6.4	3	3	178	-8.65	-7.66	7.6	34.94	0.92	204	Nano	K	Nano_K	U	midi	offshore	1	10.5489	10244386	1.16692	13237.1	1369.21	787.102	15479157	11954364	9846.19	0.15075	5.09071	0.179096	0.0241847	6889.78	2167.25	2761.99	5204488	1542407	2550.96	199008	1.21534e+07	12948250000001
	15	2019 b	12 - 34	22	21.5	0.473	Centroid	Rosette	offshore	-8.44	7.1	2.8	2.8	191	-8.61	-6.79	6.4	34.8	1.83	157	Nano	K	Nano_K	L	midi	offshore	1	22.8758	10244386	1.31179	12843.6	1765.69	2197.47	26044018	13438452	8469.69	0.598844	4.12775	0.774194	0.100718	6311.24	1241.62	3240.21	10963718	3675451	5305.31	1.00525e+06	1.44437e+07	7384888000000001
	16	2019 c	3 - 22	19	18.2	0.3458	None	Flag	innermost	-8.97	7.6	1.9	1.9	171	-8.61	-8.35	5.8	32.89	0.37	169	Nano	K	Nano_K	U	midi	glacial	3	9.72652	10244386	1.6885	83544.5	2748.51	1127.89	147825907	17297626	105337	0.717627	5.31492	0.220046	1.11607	59309.3	3195.55	1617.91	84459074	4816606	50608.6	1.34121e+06	1.86388e+07	32300620000001
Micro	17	2014	3 - 29	26	16.7	0.4342	Centroid	Diamond	offshore	-7.62	8.3	2.3	2.3	203	-8.37	-8.63	7.1	35.05	0.97	289	Micro	K	Micro_K	U	mini	offshore	1	14.6976	8709.13	1.34096	177880	20583.5	1899.39	7691304	2332175	11678.6	0.194511	7.09227	0.4309	0.0576621	50623.8	5313.66	1260.21	10539775	613024	2388.17	488.36	12165.9	2.19959e+07
	18	2015	12 - 46	34	2.9	0.0986	Centroid	Belt	innermost	-8.07	10.02	1.7	1.7	312	-7.91	-5.93	3.8	33.35	0.13	31	Micro	K	Micro_K	L	mini	glacial	3	31.405	125357	2.20589	149467	35837.2	7153.03	702868945	35460993	276525	0.316863	9.9743	0.0606008	1.7017	52622.5	12170.4	2310.56	482523042	14658360	115655	48372.2	324896	1.90366e+10
	19	2016	3 - 19	16	11.4	0.1824	Upper corner	Flare	innermost	-7.99	7.9	1.7	1.7	198	-8.95	-9.34	5.24	33.24	0.26	119	Micro	K	Micro_K	U	mini	glacial	3	9.84858	9689.14	1.54922	225271	17435.3	650.717	39964239	2976947	15010.6	0.774081	4.48971	0.250399	1.1815	75803.4	10362.2	515.047	34774048	1719772	3787.64	955.736	15965.4	1.69705e+06
	20	2017	2 - 29	27	51	1.377	Lower corner	Fingers	offshore	-8.28	8.6	1.9	1.9	208	-8.74	-8.01	6.9	34.95	1.02	440	Micro	K	Micro_K	U	maxi	offshore	1	16.1438	68326.7	1.41952	176416	20558.3	2427.59	76464827	8984984	96991.5	0.393501	6.84446	0.734145	0.0657606	30462.5	6378.37	2004.92	26551790	1708091	26231.4	7094.27	104085	1.4356e+07
	21	2018	2 - 39	37	5.5	0.2035	Centroid	Belt	innermost	-8.82	9	1.6	1.6	252	-7.82	-7.38	4.5	33.06	0.15	64	Micro	K	Micro_K	U	mini	glacial	3	15.4477	151714	1.98379	180254	27286.1	2011.04	1602692112	74646121	300968	0.871286	9.06705	0.0564261	1.15747	76210.1	25470.7	1430.06	2537926242	75506065	263018	229854	530820	1.55705e+08
	22	2019	3 - 50	47	16.3	0.7661	None	Flag	innermost	-8.73	8	1.9	1.9	195	-8.44	-8.45	6.1	33.58	0.25	274	Micro	K	Micro_K	U	mini	glacial	3	18.3575	43038.1	2.31469	156189	10362	1163.34	131142982	15033781	99619.7	0.690556	11.9671	0.204817	1.23776	100016	13745.8	1323.74	89136306	6401904	47226.3	22388.4	122007	4.06985e+08
Small	23	2014 a	3 - 26	23	18.2	0.4186	None	Rosette	offshore	-7.59	8.4	2.5	2.4	204	-8.31	-8.57	7	35.02	1.02	265	Small	K	Small_K	U	midi	offshore	1	14.3853	127213	1.49417	190078	20824.5	2203.11	6384165	2469828	11712.1	0.220869	6.68199	0.415134	0.159757	39480.8	5934.19	2182.54	9574197	547945	2839.38	8200.51	198277	4.60563e+09
	24	2014 b	3 - 34	31	11.4	0.3534	None	Flag	innermost					199		-8.85	5.7	34.56	0.26	184	Small	K	Small_K	U	mini	glacial	3	16.2033	127213	1.5992	203439	10377.9	541.617				0.866759	8.66014	0.31378	0.61395	63452.2	7013.89	409.11				19790.6	223229	3.30614e+09
	25	2015	3 - 50	47	10.5	0.4935	None	Flag	innermost	-7.85	8.9	1.7	1.7	219	-8.54	-7.34	4.4	33.1	0.22	245	Small	K	Small_K	U	mini	glacial	3	27.0676	127096	1.66958	212198	24128.9	3216.39	127480358	8935336	54163.3	0.769991	13.6468	0.130458	1.75828	72213.8	19404.2	2965.97	240891365	10334624	73294	24575.3	236772	1.02423e+08
	26	2016	3 - 50	47	11.4	0.5358	Centroid	Flag	innermost	-7.68	8.1	1.8	1.8	217	-8.78	-9.08	5.2	33.98	0.25	239	Small	K	Small_K	U	mini	glacial	3	18.4979	165204	1.4773	244055	26702.8	751.837	23029963	1964331	11875.8	0.682082	11.514	0.487955	1.01894	74540.4	16345.6	570.679	31848981	1751431	5024.69	22766.4	266821	1.74746e+09
	27	2017 a	1 - 33	32	45.5	1.456	None	Rosette	offshore	-8.3	8.5	1.9	1.9	206	-8.77	-8.23	6.9	34.95	0.94	550	Small	K	Small_K	U	maxi	offshore	1	16.1006	169894	1.06474	180894	19792.2	2048.63	76842387	8328615	87675.9	0.356986	7.26296	0.658376	0.062997	24743.1	6184.44	1827.01	19137182	2138658	30428	3384.41	184277	4.60881e+08
	28	2017 b	2 - 50	48	12.9	0.6192	Centroid	Flag	innermost	-8.64	7.7	1.7	1.7	212	-9.12	-9.52	5.5	34.32	0.15	330	Small	K	Small_K	U	mini	glacial	3	22.3293	169894	1.33936	227550	14999.4	273.345	136465127	7778768	36653.2	0.695286	12.5863	0.120955	0.603861	60552.3	9459.89	225.603	42969335	3679098	16763.8	16113.3	243662	5.7973e+09
	29	2018	12 - 50	38	13.9	0.5282	Centroid	Diamond	innermost	-8.14	8.9	2.6	2.6	259	-6.43	-8.42	5	34.14	0.12	231	Small	K	Small_K	L	mini	glacial	3	29.4242	228927	1.23633	283029	46340.9	1518.19	27227348	9875343	84179.3	0.253309	9.21408	0.075552	0.321553	65471.1	25855.2	1295.53	89450590	8865135	37229.1	15145	298173	2.37079e+09
	30	2019	3 - 50	47	13	0.611	Lower corner	Flare	innermost	-8.3	8.2	1.9	1.9	220	-8.15	-8.49	6.1	34.4	0.14	399	Small	K	Small_K	U	midi	glacial	3	28.8645	102570	1.95116	200131	19356.4	1091.75	75579571	8881368	60369.9	0.552144	11.5417	0.119768	0.803878	84514.5	17958.9	978.58	93407745	7679399	49896.8	35690.1	235820	1.02704e+10
Medium	31	2014 a	3 - 41	38	56.3	2.1394	Upper corner	Fingers	offshore	-10.3	8.8	2.3	2.3	216	-8.57	-7.52	6.9	34.8	0.75	640	Medium	K	Medium_K	U	maxi	offshore	1	16.7189	15352.7	1.486	113688	22814.1	5096.08	6237399	1956817	7634.24	0.314322	9.63957	0.430592	0.565252	71925.8	10685.5	5932.05	7844631	695474	4729.01	5004.77	27817.8	2.36189e+08
	32	2014 b	23 - 50	27	7.9	0.2133	Upper border	Flare	offshore	-9.8	9	4.3	4.3	244	-8.53	-6.85	5.7	35.1	0.28	109	Medium	K	Medium_K	L	mini	offshore	1	38.5941	15352.7	1.2493	63997.2	19180	4716.34	128230	646537	3035.28	0.333159	6.37624	0.238089	0.029699	33150.6	5130.01	2078.9	141546	349326	1509.75	1372.1	20551.2	1.61526e+08
	33	2015	11 - 50	39	4.8	0.1872	Centroid	Belt	innermost	-10.56	10.2	1.7	1.7	259	-8.42	-6.71	4.3	33.16	0.18	113	Medium	K	Medium_K	L	mini	glacial	3	29.5375	18831.9	2.15528	244295	40587.9	4968.55	267171798	15846944	111336	0.580638	9.59786	0.116152	2.17961	81373.4	16877.4	2806.8	381329745	14862833	110395	7018.03	47605	6.91977e+06
	34	2016	11 - 50	39	10.4	0.4056	Centroid	Flag	innermost	-7.39	8.3	2.2	2.1	236	-8.47	-8.85	5.3	34.58	0.2	154	Medium	K	Medium_K	L	mini	glacial	3	25.1707	19083.8	1.78293	261044	34025.1	868.113	4932657	889109	9138.23	0.642992	10.8303	0.553859	0.351164	86420.5	15687.3	611.932	5920769	550397	3679.81	7232.63	41256.7	2.25934e+07
	35	2017 a	2 - 39	37	51	1.887	Lower corner	Fingers	offshore	-8.2	8.6	1.8	1.8	208	-8.75	-7.95	6.9	34.96	0.92	618	Medium	K	Medium_K	U	maxi	offshore	1	17.9693	16726.2	1.2548	164446	20988	2568.86	82199455	7887018	84067.8	0.469556	9.08685	0.719523	0.0774123	39278.6	5235.35	1854.92	27911726	2499064	33206.8	1305.93	22292.9	2.16317e+07
	36	2017 b	14 - 50	36	5.6	0.2016	Centroid	Belt	innermost	-8.4	7.9	1.6	1.6	235	-9.07	-9.05	5.6	34.71	0.06	174	Medium	K	Medium_K	L	mini	glacial	3	32.7982	16726.2	1.32733	254112	22201.2	322.453	112885100	5580342	25364.6	0.328522	9.821	0.01664	0.10695	68487.2	7633.68	245.036	8166857	666408	3286.43	2624.77	24825	8.61081e+06
	37	2018	17 - 50	33	10	0.33	Lower corner	Flare	innermost	-8.07	9	2.3	2.3	283	-8	-6.45	4.9	34.3	0.09	179	Medium	K	Medium_K	L	mini	glacial	3	34.8325	40473.3	1.44166	276590	58348.7	2047.55	41917420	10354847	86488.7	0.290223	8.69769	0.0377987	0.172176	78785.1	19845.5	1235.93	203595519	13737344	55365.6	6749.81	65097.5	1.56361e+08
	38	2019	16 - 50	34	8.7	0.2958	Lower border	Triangle	innermost	-8.11	8.4	2	2	244	-8.04	-8.32	6.2	34.8	0.08	228	Medium	K	Medium_K	L	mini	glacial	3	35.393	11521.9	2.60511	246469	30015.8	1443.24	55592129	7110043	51422.9	0.370266	8.24152	0.0448077	0.464103	78762.8	17168.7	979.611	77155060	6522979	45411	9820.33	39835.1	2.08057e+08
Large	39	2014 a	21 - 34	13	11.1	0.1443	Centroid	Diamond	offshore	-7.4	7.8	2.7	2.7	215	-9.42	-6.59	7.4	35.08	0.78	17	Large	K	Large_K	L	mini	offshore	1	27.172	4234.83	0.948654	30266.3	6588.07	4017.39	3810464	1983566	3816.28	0.189294	4.27783	0.0762985	0.00608756	13969	4252.73	1116.24	1513894	395460	1288.63	310.149	4326.54	3.54119e+07
	40	2014 b	3 - 30	27	41.6	1.1232	Upper border	Triangle	offshore	-6.98	8.6	2	2	259	-8.85	-6.45	6.8	34.45	0.53	278	Large	K	Large_K	U	maxi	offshore	1	11.4497	4234.83	2.27058	55688.7	24261.1	9615.5	9942943	1753882	3401.25	0.181742	6.6868	0.390026	0.727516	55342.2	16209.1	6781.85	7254992	491978	3735.67	4783.27	14397.8	2.7094e+06
	41	2014 c	25 - 50	15	6.8	0.102	None	Belt	offshore	-6.75	8.4	4.5	4.4	256	-8.53	-6.71	5.7	35.1	0.29	80	Large	K	Large_K	L	mini	offshore	1	39.2566	4234.83	1.30424	60713.8	20655.9	5523.25	92803.1	615130	2964.52	0.315129	6.24077	0.254336	0.0299241	34172	4980.07	1749.84	106212	349094	1669.79	554.371	6076.62	1.42847e+06
	42	2015 a	19 - 39	20	11.4	0.228	Centroid	Diamond	fjord	-7.28	7.9	2.2	2.2	292	-9.15	-5.57	5.4	33.96	0.63	88	Large	K	Large_K	L	mini	fjord	2	29.1714	7774.38	1.36936	8695.04	6790.54	10645.9	8475497	2235538	780.391	0.592392	5.32465	0.171113	0.190385	1503.43	3291.26	5194.85	1584184	339004	832.926	2534.91	13179.8	307165
	43	2015 b	3 - 24	21	19.9	0.4179	Upper corner	Flare	innermost	-7.49	8.7	1.7	1.7	243	-9.11	-5.92	5.9	32.54	0.39	71	Large	K	Large_K	U	midi	glacial	3	11.1761	7774.38	1.16698	65392.8	14421	9072.52	132082537	8126888	42640	1.53123	6.36513	0.167673	0.968992	80225.1	18994.7	3284.24	295495045	11623268	102908	1188.89	10260.4	1.46941e+06
	44	2016 a	3 - 24	21	33.4	0.7014	Upper corner	Flare	offshore	-7.2	8	1.8	1.8	251	-9.08	-6.6	6.2	34.39	0.62	126	Large	K	Large_K	U	midi	offshore	1	13.9468	1831.25	2.3198	46606.3	9132.8	4248.14	13833139	1330746	3453.63	0.705427	5.14974	0.690379	0.392574	35421.1	6977.8	4859.14	9349192	1000961	1409.59	5558.01	9805.15	2.44645e+06
	45	2016 b	3 - 13	10	2.6	0.026	None	Belt	fjord	-7.57	8.1	1.7	1.7	200	-9.11	-7.93	6	32.98	0.97	19	Large	K	Large_K	U	mini	fjord	2	7.37492	1831.25	1.0979	124496	16155.1	2010.54	23969278	1484102	9711.59	0.925037	2.99879	1.34872	0.45592	98435.2	17779.1	619.399	19079307	749149	2123.23	190.822	2200.36	2.23891e+06
	46	2017	1 - 50	49	82.5	4.0425	mix	Fingers	offshore	-8.01	8.5	1.8	1.8	209	-8.84	-7.27	6.7	34.57	0.81	614	Large	K	Large_K	U	maxi	offshore	1	18.2859	2785.07	1.41657	104546	15439.5	3945.24	98589734	7967224	61991.8	0.618013	11.8617	0.720809	0.975987	61105.6	9757.5	1929.27	51121005	2719371	41796.6	943.433	4887.68	2.0236e+06
	47	2018 a	1 - 25	24	12.7	0.3048	Upper border	Triangle	offshore	-8.17	7.9	4.9	4.9	279	-6.41	-5.18	6	33.75	0.37	99	Large	K	Large_K	U	mini	offshore	1	10.8865	3006.43	1.50496	5046.61	1243.59	4524.57	806467	8238752	40230.1	0.319029	5.33061	0.119012	0.457947	2144.36	891.794	1815.28	2808039	2949989	6748.76	728.298	5251.86	3.05391e+06
	48	2018 b	30 - 50	20	5.6	0.112	Lower corner	Flare	innermost	-8	9.27	3.1	3.1	310	-6.55	-7.77	4.7	34.4	0.06	49	Large	K	Large_K	L	mini	glacial	3	41.2644	3006.43	1.18986	298998	83709	3577.22	18212188	11390821	94066.3	0.255296	5.95111	0.0149949	0.0589073	65812.1	14649.8	928.604	26826738	7360130	42299	241.055	3817.27	6.37396e+06
	49	2019	3 - 29	26	50.3	1.3078	mix	Triangle	offshore	-7.79	7.8	2.8	2.8	286	-8.45	-5.3	7.4	34.35	0.68	373	Large	K	Large_K	U	maxi	offshore	1	11.7251	4636.9	1.73265	8302.14	3232.32	8034.12	16315788	8022225	6760.09	0.496272	7.02043	0.498969	0.552087	5194.86	3703.31	4597.31	7986722	2402898	3089.56	2630.69	10663.8	280317
Pico_ISF	50	2015	2 - 16	14	28.4	0.3976	Upper border	Triangle	whole transect	-8.21	7.71	1.76	1.76	212	-9.9	-5.74	6.95	31.48	0.46	157	Pico	I	Pico_I	U	midi	fjord	2	5.58461	78180568	1.60391	17512.2	4730.28	9280.97	125394575	8189865	13173.5	0.974164	2.71993	0.17728	1.3408	26720	5121.03	8200.97	51240475	2156033	12280.3	2.09386e+07	1.46333e+08	2625586000000001
	51	2016	2-13	11	32	0.352	Upper border	Triangle	whole transect	-8.93	6.58	1.7	1.7	158	-9.65	-8.76	6.65	31.96	0.2	165	Pico	I	Pico_I	U	midi	fjord	2	6.0505	53958067	1.87299	37276.3	1885.25	357.238	101062816	5953005	23754.1	0.810628	2.85686	0.0709421	1.25852	28244.1	2233.12	479.199	39774017	2315335	11963.1	1.56534e+07	1.16716e+08	1581972000000001
	52	2017	2-25	23	31.3	0.7199	Upper border	Triangle	whole transect	-8.85	7.36	1.71	1.71	171	-9.55	-7.51	7	31.75	0.38	223	Pico	I	Pico_I	U	midi	fjord	2	7.76817	163115691	1.2512	60448	1834.43	2507.71	204090739	10950897	33417.5	1.36006	5.51446	0.105483	1.84046	54102.7	1494.41	2102.97	40365081	2951966	19866.3	7.98341e+06	2.12074e+08	1629340000000001
	53	2018	3-16	13	27.2	0.3536	Upper corner	Flare	whole transect	-9.68	8.75	2.09	2.09	181	-7.42	-7.6	6.92	30.25	0.51	76	Pico	I	Pico_I	U	midi	fjord	2	6.98507	612630137	2.72708	101132	5673.46	1795.57	1670689591	201058119	1103892	0.402678	3.97134	1.66554	0.947476	59574	8969.62	1799.59	0.127561	0.498152	0.627443	9.73965e-12	1670689590	1.01627
	54	2019	3-12	9	19	0.171	Upper corner	Flare	central	-8.71	8.2	1.71	1.71	293	-8.29	-5.42	8	30.91	0.28	77	Pico	I	Pico_I	U	midi	fjord	2	6.33415	231815304	1.82514	16264.2	4205.89	7173.67	423094410	23944883	85178.2	0.515243	2.67759	0.135374	1.15452	12965.2	2582.41	3934.95	206863010	3786447	20545.2	1.01141e+08	5.24236e+08	4.27923e+16
Nano_ISF	55	2015a	2-17	15	31.4	0.471	Upper border	Triangle	whole transect	-8.19	7.84	1.8	1.8	212	-9.83	-5.82	6.98	31.41	0.52	150	Nano	I	Nano_I	U	midi	fjord	2	6.27234	6749611	1.26105	19266.2	5066.38	10757.3	119374510	8511564	14471.3	0.932674	3.19373	0.189107	1.3695	28987.4	5294.09	10101.4	54391971	2003854	12540.8	471762	8.98332e+06	8702435000001
	56	2015b	31-39	8	3.1	0.0248	Lower corner	Flare	innermost	-9.17	6.2	2.04	2.04	153	-9.69	-7.82	2.02	33.96	0.08	19	Nano	I	Nano_I	L	mini	glacial	3	35.801	6749611	1.0402	13250.7	456.062	153.19	65283863	7020971	25553.3	0.434555	2.15167	0.00771647	0.10609	7764.26	173.832	85.7687	14046752	1228931	3395.22	215109	7.23608e+06	54171510000001
	57	2016	2-19	17	29.1	0.4947	Upper border	Triangle	whole transect	-8.84	6.72	1.86	1.86	163	-9.52	-8.47	6.61	32.4	0.32	213	Nano	I	Nano_I	U	midi	fjord	2	8.4805	4690829	1.31068	38153.9	2342.47	403.635	66898829	6148157	20466	0.671647	4.30559	0.173737	1.46917	34775.6	3232.41	418.976	49142298	1819873	12363.1	538688	6.68684e+06	5773916000001
	58	2017	2-24	22	31.4	0.6908	Upper border	Triangle	whole transect	-8.81	7.28	1.73	1.7	171	-9.55	-7.19	6.92	32	0.45	304	Nano	I	Nano_I	U	midi	fjord	2	8.79804	8141562	1.27256	48005.7	1603.47	2497.6	184586325	10360596	27239.5	1.29778	4.93065	0.135725	1.72045	50742.4	1506.45	2024.41	46272923	2699495	20014.2	703364	1.1064e+07	4648479000001
	59	2018	3-50	47	27.2	1.2784	Upper corner	Flag	innermost	-9.41	8.86	2.33	2.34	201	-6.82	-8.01	5.87	31.24	0.39	200	Nano	I	Nano_I	U	midi	glacial	3	14.9035	86743471	1.627	159917	13253.9	1581.76	761363084	141131587	923716	2.09952	12.2996	0.21545	2.03107	101424	16732.9	1544.96	1329288901	78126777	308783	4.3249e+07	1.84381e+08	5360776000001
	60	2019	3-34	31	25.3	0.7843	Centroid	Diamond	whole transect	-8.66	8.13	2.04	2.04	264	-8.09	-5.65	6.71	32.77	0.43	231	Nano	I	Nano_I	U	midi	fjord	2	11.7858	19519053	1.21037	12498.3	2901.35	4587.13	198084380	23625194	89334.4	1.15889	6.79633	0.185783	1.43399	11889.9	1922.86	3018.51	190915972	3917294	41815.6	649527	2.42747e+07	8714104000001
Micro_ISF	61	2015a	2-18	16	5.7	0.0912	Upper border	Triangle	central	-8.56	7.77	1.84	1.84	165	-9.29	-6.99	6.76	32.08	0.52	39	Micro	I	Micro_I	U	mini	fjord	2	8.64411	22706.7	1.43789	42608.8	2070.1	3702.51	130812685	9466236	32649.7	0.558133	4.99758	0.102318	0.510093	41273.8	876.133	1768.51	69715710	2878572	9765.37	2920.78	35569.4	4.50812e+06
	62	2015b	25-51	26	3.27	0.08502	Centroid	Diamond	innermost	-8.89	6.63	2.09	2.09	155	-9.38	-7.71	1.8	34	0.08	62	Micro	I	Micro_I	L	mini	glacial	3	38.1054	22706.7	1.10598	18888.1	714.695	220.385	48090501	5563164	25113.1	1.01905	6.1202	0.0170718	0.247662	11923.3	447.311	146.286	14920968	1312769	2064.9	169.784	25281.9	1.74696e+09
	63	2016	2-17	15	24.9	0.3735	Centroid	Diamond	whole transect	-8.89	6.8	1.8	1.8	162	-9.53	-9.24	6.4	32.09	0.22	128	Micro	I	Micro_I	U	midi	fjord	2	8.4723	22164.6	1.33363	58115.9	2904.41	297.129	79673651	6071853	29559.3	0.961946	3.70283	0.0729986	1.25155	47046.7	4425.31	336.985	46375088	2513368	9630.55	3137.67	32696	4.55458e+07
	64	2017a	2-7	5	2.3	0.0115	Centroid	Rosette	central	-9.04	7.3	1.76	1.76	152	-9.64	-7.54	7.27	32.69	0.38	16	Micro	I	Micro_I	U	mini	fjord	2	4.25484	23582.1	2.17562	31274.6	732.501	2626.42	216541581	13703551	51305.6	0.172067	1.55945	0.0404229	0.147441	15619.5	545.888	752.22	31411424	1751373	11152.5	2424.26	53728.8	1.78921e+09
	65	2017b	2-30	28	10.2	0.2856	Upper border	Triangle	central	-8.93	7.41	1.73	1.73	173	-9.44	-8.37	6.1	32.55	0.37	171	Micro	I	Micro_I	U	mini	fjord	2	12.6948	23582.1	1.68891	87860.4	2075.36	1725.36	198401499	10759567	39828.1	1.23396	7.05791	0.139487	1.63312	53001.6	1252.88	2068.06	51004216	3419955	15015.6	5661.06	45488.2	9.54536e+06
	66	2018a	3-50	47	2.8	0.1316	Upper corner	Flare	central	-8.94	9.49	2.07	2.07	271	-6.62	-7.64	4.46	33.43	0.22	49	Micro	I	Micro_I	U	mini	fjord	2	21.9564	685998	1.30881	286123	49933.7	2485.78	1074422989	127807317	897839	0.993839	14.429	0.179998	0.828147	93091.9	31819.2	1289.57	2330423190	135094410	464029	239823	1.13766e+06	1.50805e+08
	67	2018b	3-50	47	20.7	0.9729	Upper corner	Fingers	whole transect	-9.35	8.83	2.56	2.56	205	-6.61	-8.23	5.42	31.52	0.34	209	Micro	I	Micro_I	U	midi	fjord	2	18.8301	685998	1.23593	178414	14853.8	1379.21	476457091	117825893	847843	2.41264	13.7718	0.238302	2.11548	109417	17643	1454.86	700665559	59601697	250792	74184.5	922027	1.43115e+08
	68	2019a	7-51	44	1.3	0.0572	Centroid	Belt	central	-8.55	7.88	3.54	3.54	177	-6.95	-6.49	4.91	34.07	0.19	28	Micro	I	Micro_I	L	mini	fjord	2	34.6577	121293	1.88117	17662	1200.97	748.525	16747729	9514242	228172	0.599744	11.44	0.0991772	0.236779	19684.4	995.128	846.803	34792762	4157819	87090.4	33241.4	261412	3.94668e+08
	69	2019b	8-51	43	5	0.215	Centroid	Belt	central	-8.68	7.77	2.17	2.17	194	-7.51	-6.69	3.54	33.85	0.14	21	Micro	I	Micro_I	L	mini	fjord	2	31.8606	121293	1.15468	20297.8	1181.17	1277.74	78937694	11993718	140054	2.71443	14.3121	0.151687	1.10221	10405.8	657.083	1510.7	134415177	5826428	31227.6	6962.77	147016	1.39368
Small_ISF	70	2015a	3-51	48	4.6	0.2208	Centroid	Belt	central	-8.3	7.34	2.05	2.05	176	-9.04	-7.67	4.83	33.25	0.28	100	Small	I	Small_I	U	mini	fjord	2	26.7322	36994.4	1.65572	61252.3	1420.61	1343.31	34929974	3497518	14990.9	1.05347	11.9453	0.189051	0.540048	27292.2	764.644	1356.37	40970598	2794663	9933.7	12160.6	73411.9	4.33124e+09
	71	2015b	2-51	49	12.9	0.6321	mix	Flag	innermost	-8.23	8	1.88	1.88	196	-9.16	-7.44	4.17	32.1	0.26	37	Small	I	Small_I	U	mini	glacial	3	25.7519	36994.4	1.5373	56871.6	7294.21	10841.2	78523149	6277375	18401.8	3.56424	19.9254	0.267878	2.38585	30457.2	8347.83	14689.1	58884420	2746921	8338.1	16311.1	73181.7	2.69866e+07
	72	2016	3-26	23	24.6	0.5658	mix	Rosette	whole transect	-8.68	7.1	1.9	1.9	178	-9.31	-9.21	5.69	33	0.26	105	Small	I	Small_I	U	midi	fjord	2	11.2064	56515.8	1.51664	85714.3	5111.72	305.781	52077652	5022430	24251.1	1.21845	4.91271	0.124423	1.16344	43858.6	5422.14	362.414	36588656	2168360	11632.1	22441.8	108155	7.1396e+08
	73	2017a	2-49	47	10	0.47	Centroid	Rosette	central	-8.86	7.21	1.67	1.69	187	-9.33	-8.82	4.55	33.75	0.2	230	Small	I	Small_I	U	mini	fjord	2	24.1637	73436.3	1.5326	112548	2967.44	636.654	156921504	7239758	27271.8	1.25435	11.4325	0.164326	0.800804	34145.1	1262.6	1146.88	52805153	3951281	17549.5	10359	122906	7.9773e+08
	74	2017b	2-11	9	4.4	0.0396	Upper corner	Fingers	innermost	-8.04	8.43	1.66	1.7	171	-9.39	-7.45	8.3	30.87	0.42	28	Small	I	Small_I	U	mini	glacial	3	5.57007	73436.3	1.15215	84610	4168.21	3696.96	173383792	8462933	8703.28	0.498088	2.59211	0.124742	0.928738	24880.8	2234.7	2277.19	16247530	537354	2399.21	7316.53	91925.6	2.9271e+09
	75	2018a	3-51	48	11.1	0.5328	Centroid	Diamond	central	-8.74	9.26	4.09	4.09	261	-5.99	-8.18	4.03	33.81	0.13	204	Small	I	Small_I	U	mini	fjord	2	29.7024	244576	1.28414	314070	50733.2	1863.77	43283762	41033167	503187	0.74825	12.0545	0.127236	0.505052	76696.6	34622.8	1457.24	108952610	26872128	151948	18729.5	332798	3.54906e+09
	76	2018b	17-51	34	4.7	0.1598	Centroid	Diamond	innermost	-8.95	9.11	4.2	4.2	249	-5.91	-8.62	2.52	33.73	0.07	109	Small	I	Small_I	L	mini	glacial	3	35.5948	244576	1.23449	301927	33649.2	998.184	54029848	61467127	647174	1.80625	8.74428	0.0661507	0.536123	49356.8	14491.6	534.307	85539371	32980938	194406	8068.47	309994	1.68098e+08
	77	2019a	3-51	48	3.8	0.1824	Centroid	Belt	innermost					186		-7.94	5	33.51	0.11	90	Small	I	Small_I	U	mini	glacial	3	27.7952	51642.1	1.78721	92295.4	4338.38	1344.47				1.80688	14.3002	0.11492	1.55742	58258.9	4679.36	3280.95				36774.3	129069	8.40272e+08
	78	2019b	28-51	23	1	0.023	Lower border	Belt	central	-8.73	7.61	2.29	2.29	200	-7.85	-7.74	4.27	34.37	0.05	30	Small	I	Small_I	L	mini	fjord	2	41.5647	51642.1	1.35112	69774.5	1696.55	247.051	49759516	7940441	73053.8	0.174297	7.18279	0.00758722	0.0849916	17361.2	981.883	169.594	12178617	728353	18482.6	4319.79	74093.3	6.02838e+07
Medium_ISF	79	2015a	2-18	16	15.9	0.2544	Upper border	Triangle	innermost	-7.88	8.28	1.8	1.8	255	-9.97	-5.67	7.7	30.36	0.58	73	Medium	I	Medium_I	U	mini	glacial	3	6.46146	4310.4	2.03783	17514.5	8783.87	18277.2	114910504	7762817	9126.94	0.520794	3.72642	0.182474	1.25241	22935.7	5735.29	10683.1	64649539	2488014	5414.75	3744.76	12527.6	1.37145e+07
	80	2015b	2-14	12	9	0.108	Upper corner	Fingers	central	-7.96	7.84	1.8	1.8	211	-10.4	-5.95	6.11	32.51	0.46	17	Medium	I	Medium_I	U	mini	fjord	2	7.11336	4310.4	0.986291	22446	4251.3	10635.4	87276025	6945530	5219.37	1.01756	4.25179	0.179871	0.293225	32447.2	1382.01	4623.34	38587847	1317653	2227.66	449.261	4699.57	2.62249e+07
	81	2016a	4-17	13	31.8	0.4134	mix	Rosette	whole transect	-8.46	7.4	1.98	1.98	198	-9.22	-8.49	6.02	33.24	0.34	56	Medium	I	Medium_I	U	midi	fjord	2	10.434	5285.12	1.59524	93268.1	8431.03	434.325	39689082	4735721	19322.6	0.737987	3.27813	0.14085	0.855324	55694.3	6106.41	383.007	25704584	1332436	7504.37	4422.74	12852.8	4.98682e+06
	82	2016b	23-47	24	7.2	0.1728	Centroid	Diamond	central	-8.16	7.15	3.66	3.66	206	-7.95	-7.81	4.71	34.4	0.13	31	Medium	I	Medium_I	L	mini	fjord	2	35.4806	5285.12	1.04202	30565.9	5507.18	389.785	2504194	1601366	12659.5	0.307934	5.74174	0.0315243	0.0776987	12028.6	1172.97	165.691	1112892	162046	889.897	249.83	5756.01	2.23327e+06
	83	2017a	2-14	12	4.4	0.0528	Upper corner	Flare	innermost	-8.02	8.47	1.67	1.7	176	-9.52	-7.32	8.27	30.92	0.43	23	Medium	I	Medium_I	U	mini	glacial	3	6.01239	3329.43	1.4886	85203.2	4956.21	4288.75	169086822	8493258	8761.18	0.64574	3.10162	0.140024	0.9909	29535.5	1960.75	2252.14	20445734	491994	2232.44	775.702	5730.91	8.04541e+07
	84	2017b	2-51	49	7.1	0.3479	Centroid	Diamond	central	-8.77	7.29	1.68	1.68	196	-9.25	-8.69	4.33	33.77	0.17	141	Medium	I	Medium_I	U	mini	fjord	2	27.4409	3329.43	1.14212	119545	3802.62	839.035	142595536	6188093	22059.9	1.46261	11.4697	0.158549	1.11397	37870.1	805.769	1878.43	40087703	3262428	13713.9	170.741	3972.36	6.66887e+06
	85	2018a	25-51	26	3.7	0.0962	Centroid	Diamond	innermost	-8.87	9.24	4.23	4.23	262	-5.91	-8.55	1.77	33.97	0.04	62	Medium	I	Medium_I	L	mini	glacial	3	8.85044	36263.2	1.19729	327324	43417.4	1333.76	53708928	60553566	626128	1.37003	6.9944	0.0302068	0.315566	38571.9	10058.4	409.399	92145953	31741607	182030	2330.22	45746.7	2.80274e+07
	86	2018b	5-51	46	8.5	0.391	Lower border	Triangle	central	-8.65	9.37	2.9	2.9	287	-5.97	-7.79	3.74	34	0.09	153	Medium	I	Medium_I	U	mini	fjord	2	32.9445	36263.2	1.75681	314751	63707.4	2444.42	123434545	43224947	522557	0.644877	11.9158	0.103587	0.382964	107172	30802.4	1412.28	723161618	52406625	235561	14892.9	78599.3	30218.7
	87	2019	3-49	46	33.1	1.5226	Upper corner	Fingers	whole transect	-8.25	8.45	1.78	1.78	237	-8.11	-5.98	7.09	31.68	0.29	141	Medium	I	Medium_I	U	midi	fjord	2	12.7096	4685.5	1.40735	44507.8	6594.14	7588.67	324151699	22727670	86548.7	1.67755	10.644	0.194645	2.09752	62307.9	4124.27	5513.84	278514943	5618379	51655.5	2579.51	9172.65	1.04485e+07
Large_ISF	88	2015	2-24	22	31.4	0.6908	Upper corner	Flare	whole transect	-7.88	8.02	1.84	1.84	257	-10	-5.43	6.85	31.42	0.55	139	Large	I	Large_I	U	midi	fjord	2	8.966	8895.61	1.61922	13072.9	5828.09	14404	85824318	6526077	7422.23	1.14753	5.24874	0.184053	1.46329	19136.7	5257.58	9085.12	51831030	2430722	4838.54	5730.33	20133.3	6.7256e+07
	89	2016	2-33	31	31.7	0.9827	Upper corner	Flare	whole transect	-8.15	7.29	1.89	1.89	176	-9.26	-7.79	6.03	33.15	0.33	99	Large	I	Large_I	U	midi	fjord	2	2.57547	668.18	1.47337	40078.8	3714.05	984.475	50224647	4963829	16050.3	1.00192	8.69027	0.147643	1.38556	39643	4160.87	517.596	53853428	2454519	8467.92	272.131	1255.61	229632
	90	2017a	2-18	16	11.4	0.1824	Upper corner	Flare	central	-8.56	7.23	1.69	1.7	184	-9.54	-5.93	6.15	33.38	0.46	61	Large	I	Large_I	U	mini	fjord	2	8.2177	3014.87	1.11492	14235.1	646.111	3361.33	156244827	8314108	15279.3	0.909172	4.0641	0.119179	0.502814	15787.1	589.501	1207.82	33880602	2454255	14772.5	434.001	3794.33	4.42249e+06
	91	2017b	2-21	19	15.6	0.2964	Centroid	Rosette	innermost	-8.45	7.79	1.72	1.7	174	-9.41	-6.63	7.96	30.78	0.51	150	Large	I	Large_I	U	mini	glacial	3	8.18672	3014.87	1.51843	32066.1	2174.68	4577.86	171350030	9421734	18239.5	0.991522	4.37861	0.155658	1.55034	28824.5	1859.45	2159.22	36953432	2319468	12087	1018.43	5595.29	3.23852e+06
	92	2018a	3-51	48	9.9	0.4752	mix	Flag	central	-8.69	9.18	2.4	2.4	303	-6.1	-6.93	4.21	33.71	0.2	139	Large	I	Large_I	U	mini	fjord	2	25.6482	2308.45	1.4328	249679	56567.6	3307.54	269975187	56815186	535376	1.08777	15.0999	0.211682	0.69332	164915	40878.6	1611.87	1363345218	81541218	346754	785.514	4092.05	1.54838e+07
	93	2018b	3-15	12	14.7	0.1764	Upper border	Triangle	innermost	-9.27	8.73	2.56	2.56	166	-6.69	-7.03	7.81	28.96	0.52	65	Large	I	Large_I	U	mini	glacial	3	6.52763	2308.45	1.6537	62939	1775.03	3817.49	465274148	116411660	782436	0.811319	3.45125	0.096622	1.53448	51867.8	1298.27	1740.71	645701300	62199083	279958	793.731	4610.22	1.02037e+08
	94	2019	3-34	31	33.9	1.0509	Upper corner	Flare	whole transect	-8.36	8.43	1.83	1.83	269	-8.16	-5.53	7.49	31.5	0.36	173	Large	I	Large_I	U	midi	fjord	2	9.21448	5652.89	1.49191	19197.8	5123.44	8433.63	295779337	23487524	86353.9	1.20432	6.31134	0.180673	1.80514	25751.7	3661.53	4089.54	236052274	4032244	40981.3	1983.05	10415.7	7357.26
[truncated: 10 more columns]
