# Supplementary material for: Cells of matter and life – towards understanding the internal structure and spatial patchiness of particles and plankton distribution in the Arctic fjords
Source: Copernicus journal article supplement (doi:10.5194/bg-2021-98), 2021-04-15
Supplement: Supplementary file [file bg-2021-98-AC1-supplement.pdf]

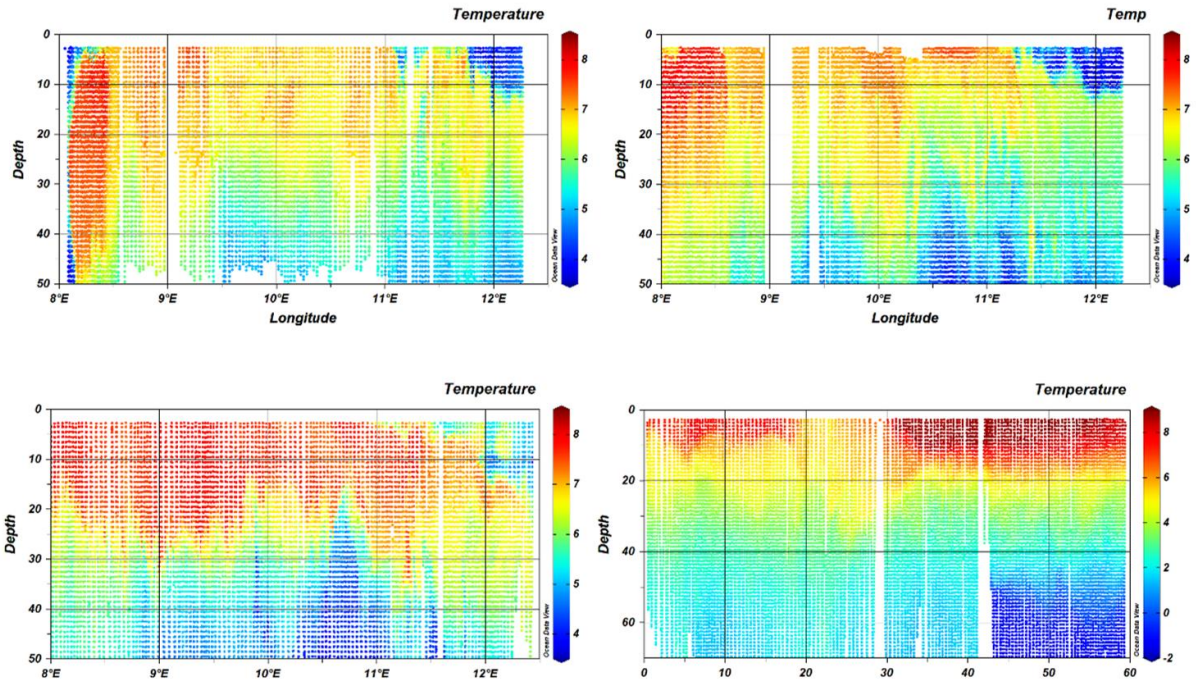

The resolution of measurements. Each dot represent a datapoint used for interpolation and further analyses. Here examples of temperature from Kongsfjorden from 2014, 2017 (1<sup>st</sup> row) and 2019 (left in 2<sup>nd</sup> row) years, as well as from the Isfjorden transect from 2017 (right in 2<sup>nd</sup> row).

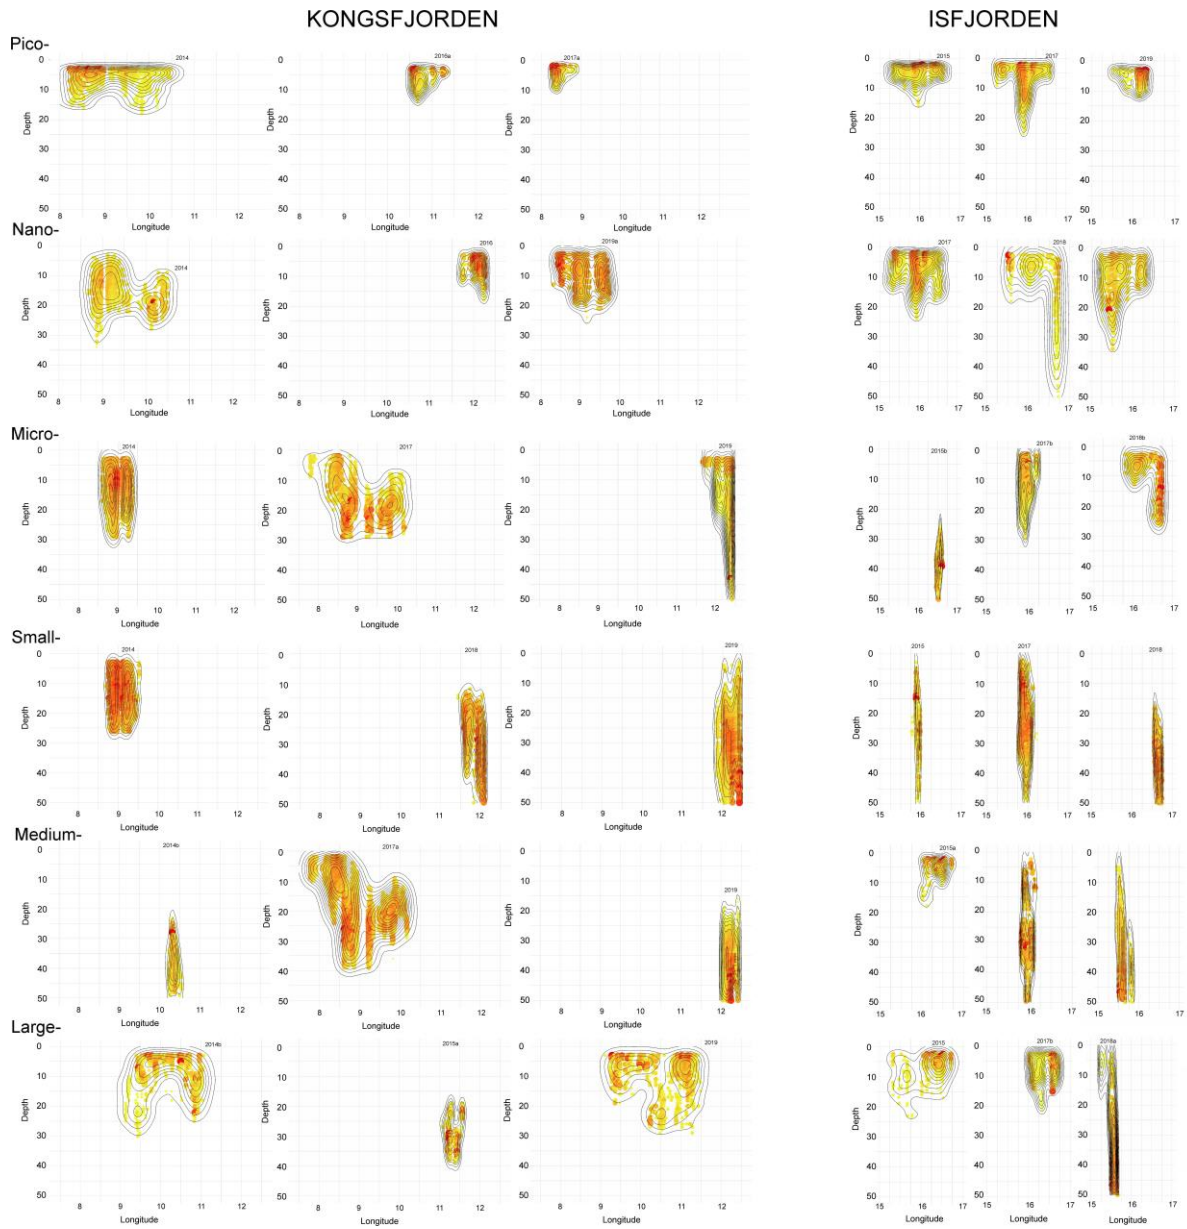

A proposition of the alternative to Figure 4 – to present some exemplary patches in form of the coloured and sized dots according to the observed concentrations together with the isolines of the density of data points used.
